# Supplementary material for: The Rvv two-component regulatory system regulates biofilm formation and colonization in Vibrio cholerae
Source: PubMed Central journal article supplement (PMC10237652; doi:10.1371/journal.ppat.1011415), 2023-05-22

**A**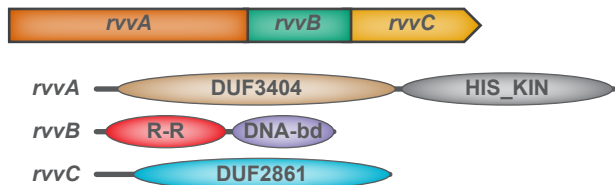**B**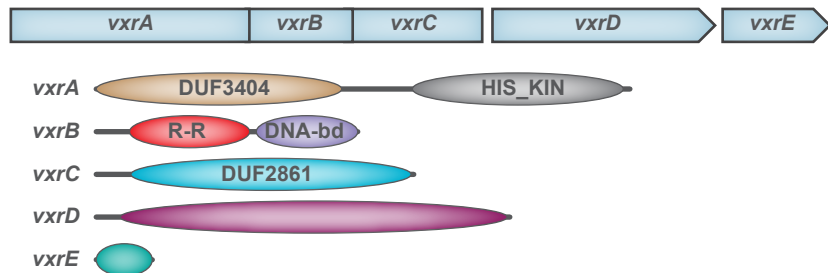**C**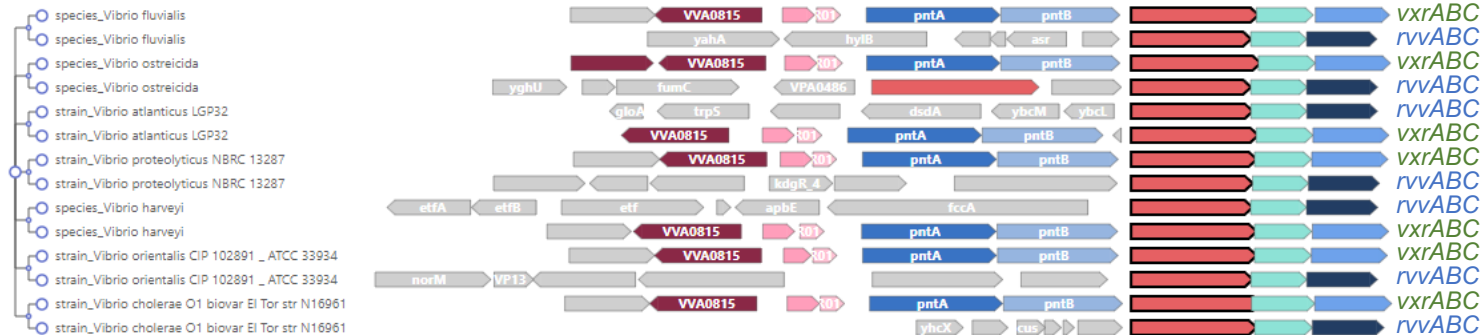

Supplement: ppat.1011415.s004.pdf [file ppat.1011415.s004.pdf]
