# Supplementary material for: The Rvv two-component regulatory system regulates biofilm formation and colonization in Vibrio cholerae
Source: PubMed Central journal article supplement (PMC10237652; doi:10.1371/journal.ppat.1011415), 2023-05-22
Supplement: ppat.1011415.s005.pdf [file ppat.1011415.s005.pdf]

**A**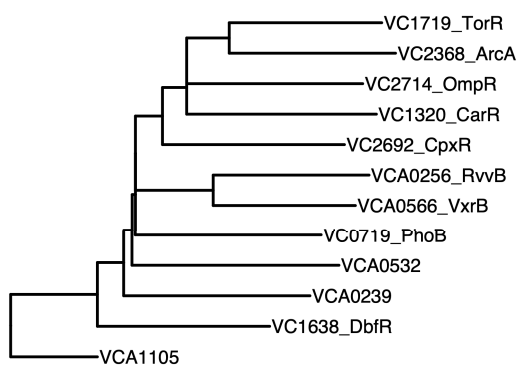

```

--MSYHVLVEIDLVTRSKLSGFQNEGYQVTEASGAQMRLEALNDIIDLVLINLPGEGLLLTRELRSQ---SEFIGILVTGRDSTIKVGLENGADYVTKPVDLREL
-MQTPQILIVEIQVTRNTLKSIFEAEGYAVFEASGEEMHOVLSDYPIINLVIMINLPGKNGLLLARELREQ---ADVALMFLTGRDNEVYIKLGLAIGADYITKPFNPREL
MVENHKVLVVDARLRALLERYLSEQGFQVRSVANGEQMRLLTRENPHLMVLLMLPGEGLSICRRLRNS---NMMPIIMLTAKGDEIDRVIGLEVAGDYLPKPFNPREL
MSWQPSLYIIEIDTKLREMLAEVMTNQGFQVTFATGETAPEQILLNQPIIDLVLINLPGENGLTICRQITRAQ---FLGKILMLTASDDDFHVAALEMGADYFVKNPIKPRVL
---MAHILLIDIDTELTSLLTEVLQYEGFEISQANDGEAGL-AAVSDIETLILLVMMPKLNGMETLKRLEK---WATPVLMLTAKGEEIDRVIGLEVAGDYLPKPFSDREL
---MKRILLIEIDTLGGGLRDYLHDHGYACEWTSQVQEKH---WFSTDLVILLRQLHDDGSLKHLPHWL---MLKALPVIVLTAKTEVEQRIGELKAGAKDYLPKPFSDREL
--YKQTLLEVEIDKNLDGLLVSLAQGVYDCLHAETIADVKQ---WDKADLVILLRQLPDGDSVQHLMDWK---KIDPIVILLTALTVVKIKVTGLDAGANDYLTKPFAAEAL
--MSRRIIVVEIEAPIREMLCFVLEQKGYQVAEADYDSAMSKLAEPFDLVLINLPGGGINLIKMKREEMTRNIPVMLTARGEEDYKVRGLEVAGDYITKPFSPKEL
MNSEIKILLIEIEAPIQRFLTVLISGYEYQVKVASTAEQGLHLVANWPHLILLGLPDGDSLSTRELRAW---TOTPIMVISAREKADYKVALDAGANDYLTKPFSGEEL
----MRILLIEIEERARFIERGLKAEGHQIRHLKDGQYELTVKSSPEPDLILLRMLPHYDGLTLCQOIRAT---GNQVLLIMLSALGEVEERIQGLRTGADYLAQKPFHFEEL
----MKILVVEIDVQLGQQLSALQETGWPELADQGDIALYRATAEENYIVLGLPKLGLDVLVKGIRDE---NINTPVVISARDTLTRVEGLNAGIDYLTKPFEMVEL
----MRLLVEIDTLLGESMQVALSRQYTDVLERGGVYVTKLKTETPTLITLIDMDGLVLELRQIRRA---GYTLPMVILTARDDISYKVKGLDGGAEYVIGKPFALFEEL

```

**B**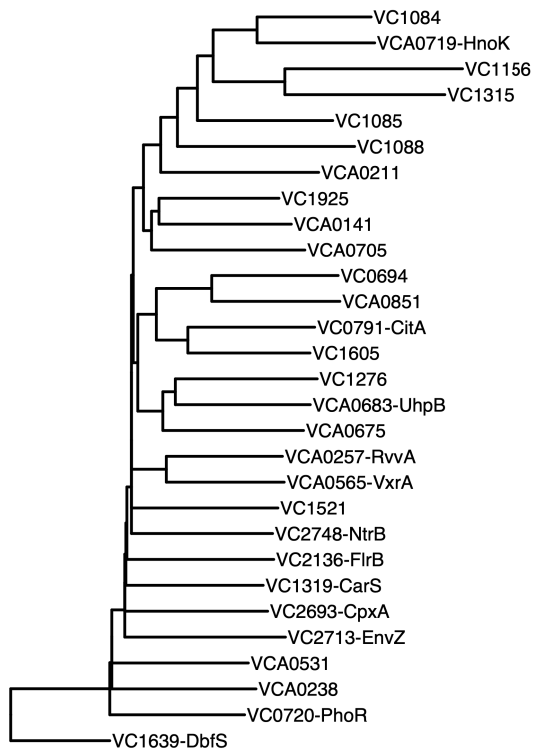

```

ASIGQLSAGIAEINNPVGFITSNLQTLSDYFNSLEKVL.....---ITESLEGSSRVMSIVKNLKEFSH---V
ASVQQLAAGVAEINNPVIGFCLSNLNTLRDYAEVFAQLA.....---VEESASGLHRVKDIVTSLQSVSH---S
AMLGQLVAGVAEINNPVAAILRGTEITLSSHIGHLIEGE.....GSLTRSIQVCAQRADMKVSKLGYAR---P
TTLGQLAAGIAEINNAIGVYSSKTERLEALFMEELLEEV.....GRDLHDLRLAAKHSVGVIVKSKVQLGRADIR
ASLGLAAGVAEINNPVGLFVMSNFSFLNEYVAQIRQHP.....---LMESELEGRSIRKNIIVSSLVVYSH---T
ISIGTLAAGVAEINNPVNGALKSHLQLIQDFNQLKVGFEESLRDACLHCVDRIKTIIVDKVQRCQAEAPL
AALGGLVAGVAEIVNTPLGIAVTTASVLIQETRESLLNAFTQSTLMELEINLRAKIVLRDFKQTAVDQVS
AVLGQMSASISEINNPVLAAIRSFADNGRRFLATNKPEEENLSRISALTERMAKISEQLKSFARKSTS
AALGRMSSAITEINNPVLTGLRLLSSNELLLERGETQKANTKLVHSLIDRMAAMTSQLKSFANRP
AVVGQTMISLAEINNPVLSAMSAYLFSAR-----LAL-----ATSLDHIENLTERMGKIVNSLRHFARKNSS
-----NPFLEFNALNTISAVI-----RRPEPKARLILHLSQFFRSNLK
-----EPFLFNLANINAI-----AVEPYKAQMLEKLTTELLRGTMR
RQHNDNLRVMSHFANRLSTIGGLIQIGAYDEAVKTIIR-----ETARQQ---QLIDFIAQTFH
REYAEMLRSQTEHRNKLNTISGLLQMGELDAVQQLIGQ-----ETEHYQ---VLIETFLRETIK
DEKKHLARELHDGINQLLVSSKCHLELLANQLNDPKQIQH-----SLMATAINEVRRISHLRPSAL
QIRKSVARELHDEITGNITAIQIQS-MLAERLASNDQAK.....VQ-----SLAMRTHQSTRQLLKLQRPHTL
EERATIARELHDSLAQSLSYLKIQLTLLKRSVTPKSDG.....ENIIREIDKGLSDAYTQRLRELLTFRLLT
RERRFILQLLTELRTPIITSLGFTVESLSRQFDELSPKAQESLWRLMADHQRLAQLSETSRHYLSPSHD
RSRMLILQILTELRTPIASLSLTVGFRREFEHLPESLYDEFRRLCEDSRRLRLAAEASKDYLDQSDSK
AALGELTAGIAEINNPVAVILGNTELIRFELGADASREEEIDAILLQIIRNITRISLLQYSRGGV
QAAKLLVRGLAEIKNPLGGLRGAQAQLERMLPDPALM.....EYTIQIIEQADRLGLVDRLLGPORPG--
SSLGRMVASLAQVRTPLSSAMLYAANLAPPNLPATRERFQSKLVDRLDLEKQVNDMLLFAKGGDN
LSNKALTNIAIDLRTPIFRIQWQAEVLAESQLNAKQQ---QQVASIIEDTEMETMVDLELYYAKLEHP
SGQQRLLSDISELRSPLTRLRMANALAM-RKLGSS-----SELERIDTEAQRLEPMIGDLLALSRMQIN
EDRALLMAGISEDIRTPLTRIRLATEEMMS-PEDSYL-----AESISDTECNQISQF-----
STRITLLASVSDLKTPLGATIGSATLLTDDPSLHLSTEQELTTSIAEQGERLNRSLLKLLDITRYTAS
HQQKEFFANVSELRSPATAILGEAQITLRSRHNSDDEYRQTLRLRISESAQLA*RIEDLLMLTRHDER
GMRRNFFANVSELRTPMTVLQGYLEMTEDPDVLAGPMWSKAHGVMTLEQLNRMNGLVNQLLTSLKIEAS
ERARHAGNLSALKTPLSVLKNEVITQLNDAQLRIQLQP-----HLGRARMASSANILSVKTA---P

```
