# Supplementary material for: The Rvv two-component regulatory system regulates biofilm formation and colonization in Vibrio cholerae
Source: PubMed Central journal article supplement (PMC10237652; doi:10.1371/journal.ppat.1011415), 2023-05-22
Supplement: ppat.1011415.s009.pdf [file ppat.1011415.s009.pdf]

**S1 Table. Strains and plasmids used.**

| <b>Strain or plasmid</b>          | <b>Relevant properties</b>                                                                                                                                                                    | <b>Source</b> |
|-----------------------------------|-----------------------------------------------------------------------------------------------------------------------------------------------------------------------------------------------|---------------|
| <b><i>E. coli</i> strains</b>     |                                                                                                                                                                                               |               |
| CC118 $\lambda$ pir               | $\Delta(\text{ara-leu})\text{araD } \Delta\text{lacX74 galE galK phoA20 thi-1 rpsE rpoB}$<br><i>argE</i> (Am) <i>recA1</i> $\lambda$ pir                                                      | [1]           |
| DH5 $\alpha$ - $\lambda$ pir      | <i>endA1 hsdR17 glnV44 (= supE44) thi-1 recA1 gyrA96 relA1</i><br>$\phi$ 80 <i>dlac</i> $\Delta(\text{lacZ})$ M15 $\Delta(\text{lacZYA-argF})$ U169 <i>zdg-232::Tn10</i><br><i>uidA::pir+</i> | [2]           |
| S17-1 $\lambda$ pir               | <i>Tp<sup>r</sup> Sm<sup>r</sup> recA thi pro r<sub>K</sub><sup>-</sup> m<sub>K</sub><sup>+</sup> RP4::2-Tc::MuK<sub>M</sub> Tn7</i> $\lambda$ pir                                            | [3]           |
| <b><i>V. cholerae</i> strains</b> |                                                                                                                                                                                               |               |
| FY_Vc_1                           | <i>Vibrio cholerae</i> O1 El Tor A1552, wild type, Rif <sup>r</sup>                                                                                                                           | [4]           |
| FY_Vc_3                           | $\Delta\text{lacZ}$ , Rif <sup>r</sup>                                                                                                                                                        | [5]           |
| FY_Vc_237                         | FY_Vc_1 Tn7:: <i>gfp</i> Rif <sup>r</sup> Gm <sup>r</sup>                                                                                                                                     | [6]           |
| FY_Vc_2272                        | $\Delta\text{vpsR}$ (VC0665), Rif <sup>r</sup>                                                                                                                                                | [7]           |
| FY_Vc_99                          | $\Delta\text{vpsT}$ (VCA0952), Rif <sup>r</sup>                                                                                                                                               | [8]           |
| FY_Vc_183                         | $\Delta\text{hapR}$ (VC0583), Rif <sup>r</sup>                                                                                                                                                | [9]           |
| FY_Vc_3411                        | $\Delta\text{vps-I}$ ( <i>vpsA-K</i> ; VC0917-27) $\Delta\text{vps-II}$ ( <i>vpsL-Q</i> ; VC0934-39), Rif <sup>r</sup>                                                                        | [10]          |
| FY_Vc_10884                       | $\Delta\text{rvvA}$ (VCA0257), Rif <sup>r</sup>                                                                                                                                               | This study    |
| FY_Vc_12787                       | $\Delta\text{rvvA}$ (VCA0257) Tn7:: <i>rvvA</i> , Rif <sup>r</sup>                                                                                                                            | This study    |
| FY_Vc_8148                        | $\Delta\text{rvvB}$ (VCA0256), Rif <sup>r</sup>                                                                                                                                               | This study    |
| FY_Vc_12081                       | $\Delta\text{rvvC}$ (VCA0255), Rif <sup>r</sup>                                                                                                                                               | This study    |
| FY_Vc_14853                       | $\Delta\text{rvvA } \Delta\text{rvvC}$ , Rif <sup>r</sup>                                                                                                                                     | This study    |
| FY_Vc_12084                       | $\Delta\text{rvvA } \Delta\text{rvvB}$ , Rif <sup>r</sup>                                                                                                                                     | This study    |
| FY_Vc_16140                       | $\Delta\text{vps-I } \Delta\text{vps-II } \Delta\text{rvvA}$ , Rif <sup>r</sup>                                                                                                               | This study    |
| FY_Vc_11814                       | $\Delta\text{vpsR } \Delta\text{rvvA}$ , Rif <sup>r</sup>                                                                                                                                     | This study    |
| FY_Vc_13576                       | $\Delta\text{vpsT } \Delta\text{rvvA}$ , Rif <sup>r</sup>                                                                                                                                     | This study    |
| FY_Vc_10876                       | $\Delta\text{hapR } \Delta\text{rvvA}$ , Rif <sup>r</sup>                                                                                                                                     | This study    |

|                        |                                                                                                                    |            |
|------------------------|--------------------------------------------------------------------------------------------------------------------|------------|
| FY_Vc_17945            | <i>rvvB</i> <sup>D57A</sup> , Rif <sup>r</sup>                                                                     | This study |
| FY_Vc_17947            | <i>rvvB</i> <sup>D57E</sup> , Rif <sup>r</sup>                                                                     | This study |
| FY_Vc_17738            | $\Delta$ <i>rvvA</i> , <i>rvvB</i> <sup>D57A</sup> , Rif <sup>r</sup>                                              | This study |
| FY_Vc_17740            | $\Delta$ <i>rvvA</i> , <i>rvvB</i> <sup>D57E</sup> , Rif <sup>r</sup>                                              | This study |
| FY_Vc_16721            | <i>rvvA</i> <sup>H289A</sup> , Rif <sup>r</sup>                                                                    | This study |
| FY_Vc_16723            | <i>rvvA</i> <sup>E290A</sup> , Rif <sup>r</sup>                                                                    | This study |
| FY_Vc_17949            | <i>rvvA</i> <sup>T293A</sup> , Rif <sup>r</sup>                                                                    | This study |
| FY_Vc_12244            | $\Delta$ <i>rvvD</i> (VCA0254), Rif <sup>r</sup>                                                                   | This study |
| FY_Vc_12245            | $\Delta$ <i>rvvE</i> (VCA0258), Rif <sup>r</sup>                                                                   | This study |
| FY_Vc_14715            | $\Delta$ <i>rvvA</i> $\Delta$ <i>rvvD</i> , Rif <sup>r</sup>                                                       | This study |
| FY_Vc_17364            | $\Delta$ <i>rvvA</i> $\Delta$ <i>rvvE</i> , Rif <sup>r</sup>                                                       | This study |
| <b>Plasmids</b>        |                                                                                                                    |            |
| pGP704- <i>sacB</i> 28 | pGP704 derivative; <i>mob-oriT sacB</i> , Ap <sup>r</sup>                                                          | [10]       |
| pMCM11                 | pGP704::mTn7- <i>gfp</i> , Gm <sup>r</sup> Ap <sup>r</sup>                                                         | [10]       |
| pUX-BF13               | oriR6K helper plasmid, <i>mob-oriT</i> , provides the Tn7 transposition function in <i>trans</i> , Ap <sup>r</sup> | [11]       |
| pBBRlux                | <i>luxCDABE</i> -based promoter fusion vector, Cm <sup>r</sup>                                                     | [12]       |
| pFY_3406               | pBBR/ <i>lux vpsL</i> promoter, Cm <sup>r</sup> (-607, +158)                                                       | [13]       |
| pFY_0989               | pBBR/ <i>lux vpsR</i> promoter, Cm <sup>r</sup>                                                                    | [14]       |
| pFY_0988               | pBBR/ <i>lux vpsT</i> promoter, Cm <sup>r</sup>                                                                    | [14]       |
| pFY_1038               | pBBR/ <i>lux ctxA</i> promoter, Cm <sup>r</sup>                                                                    | [14]       |
| pFY_951                | pBBR/ <i>lux tcpA</i> promoter, Cm <sup>r</sup>                                                                    | [14]       |
| pFY_5921               | pBBR/ <i>lux rvvA</i> promoter, Cm <sup>r</sup> (-102, +9)                                                         | This study |
| pFY_5925               | pBBR/ <i>lux rvvE</i> promoter, Cm <sup>r</sup> (-150, +9)                                                         | This study |
| pFY_5927               | pBBR/ <i>lux rvvD</i> promoter, Cm <sup>r</sup> (-500, +9)                                                         | This study |

## References:

1. Herrero M, de Lorenzo V, Timmis KN. Transposon vectors containing non-antibiotic resistance selection markers for cloning and stable chromosomal insertion of foreign genes in gram-negative bacteria. *Journal of Bacteriology* 1990;172:6557–67.
2. Platt R, Drescher C, Park SK, Phillips GJ. Genetic System for Reversible Integration of DNA Constructs and lacZ Gene Fusions into the Escherichia coli Chromosome. *Plasmid* 2000;43:12–23.
3. Simon R, Priefer U, Pühler A. A broad host range mobilization system for in vivo genetic engineering: Transposon mutagenesis in gram negative bacteria. *Bio/Technology* 1983;1:784–91.
4. Yildiz FH, Schoolnik GK. *Vibrio cholerae* O1 El Tor: Identification of a gene cluster required for the rugose colony type, exopolysaccharide production, chlorine resistance, and biofilm formation. *Proc. Natl. Acad. Sci. U.S.A.* 1999;96:4028–33.
5. Casper-Lindley C, Yildiz FH. VpsT Is a Transcriptional Regulator Required for Expression of vps Biosynthesis Genes and the Development of Rugose Colonial Morphology in *Vibrio cholerae* O1 El Tor. *Journal of Bacteriology* 2004;186:1574–8.
6. Beyhan S, Tischler AD, Camilli A, Yildiz FH. Transcriptome and phenotypic responses of *Vibrio cholerae* to increased cyclic di-GMP level. *Journal of bacteriology* 2006;188:3600–13.
7. Yildiz FH, Dolganov NA, Schoolnik GK. VpsR, a Member of the Response Regulators of the Two-Component Regulatory Systems, Is Required for Expression of vps Biosynthesis Genes and EPS<sup>ETr</sup>-Associated Phenotypes in *Vibrio cholerae* O1 El Tor. *J Bacteriol* 2001;183:1716–26.
8. Kitts G, Giglio KM, Zamorano-Sánchez D, Park JH, Townsley L, Cooley RB, et al. A Conserved Regulatory Circuit Controls Large Adhesins in *Vibrio cholerae*. *mBio* 2019;10:e02822-19.
9. Beyhan S, Bilecen K, Salama SR, Casper-Lindley C, Yildiz FH. Regulation of Rugosity and Biofilm Formation in *Vibrio cholerae*: Comparison of VpsT and VpsR Regulons and Epistasis Analysis of vpsT, vpsR, and hapR. *Journal of Bacteriology* 2007;189:388–402.
10. Fong JCN, Yildiz FH. Interplay between Cyclic AMP-Cyclic AMP Receptor Protein and Cyclic di-GMP Signaling in *Vibrio cholerae* Biofilm Formation. *J Bacteriol* 2008;190:6646–59.
11. Bao Y, Lies DP, Fu H, Roberts GP. An improved Tn7-based system for the single-copy insertion of cloned genes into chromosomes of gram-negative bacteria. *Gene* 1991;109:167–8.
12. Lenz DH, Mok KC, Lilley BN, Kulkarni RV, Wingreen NS, Bassler BL. The Small RNA Chaperone Hfq and Multiple Small RNAs Control Quorum Sensing in *Vibrio harveyi* and *Vibrio cholerae*. *Cell* 2004;118:69–82.
13. Zamorano-Sánchez D, Fong JCN, Kilic S, Erill I, Yildiz FH. Identification and Characterization of VpsR and VpsT Binding Sites in *Vibrio cholerae*. *J. Bacteriol.* 2015;197:1221–35.
14. Rogers A, Townsley L, Gallego-Hernandez AL, Beyhan S, Kwuan L, Yildiz FH. The LonA Protease Regulates Biofilm Formation, Motility, Virulence, and the Type VI Secretion System in *Vibrio cholerae*. *J Bacteriol* 2016;198:973–85.
